# Supplementary material for: Five-year trends in U.S. child and adolescent 24-hour movement behavior guideline adherence, 2018-2022
Source: Research Square preprint supplement (doi:10.21203/rs.3.rs-7215360/v1), 2025-08-11
Supplement: Supplementary file 1 [file c10f2e859bd482a3f2d06444.docx]

**APPENDIX A**

**Table A1.** Marginal predicted probabilities of male and female children and adolescents adhering to 24-hour movement behavior between 2018-2022 (N=135,309, Representative N=48,419,077).

| **24-hour guideline** | **Year** | | | | | | | | | |
| --- | --- | --- | --- | --- | --- | --- | --- | --- | --- | --- |
| **2018** | | **2019** | | **2020** | | **2021** | | **2022** | |
| **Margin** | **95% CI** | **Margin** | **95% CI** | **Margin** | **95% CI** | **Margin** | **95% CI** | **Margin** | **95% CI** |
| Physical Activity Male | 0.24 | 0.22-0.26 | 0.22 | 0.19-0.23 | 0.22 | 0.20-0.23 | 0.23 | 0.22-0.25 | 0.20 | 0.19-0.22 |
| Physical Activity Female | 0.17 | 0.16-0.19 | 0.17 | 0.15-0.18 | 0.16 | 0.14-0.17 | 0.16 | 0.14-0.17 | 0.14 | 0.13-0.15 |
| Screentime Male | 0.49 | 0.47-0.51 | 0.49 | 0.47-0.51 | 0.38 | 0.37-0.40 | 0.42 | 0.40-0.43 | 0.46 | 0.44-0.47 |
| Screentime Female | 0.55 | 0.53-0.58 | 0.54 | 0.52-0.57 | 0.43 | 0.41-0.45 | 0.47 | 0.45-0.48 | 0.49 | 0.47-0.50 |
| Sleep Male | 0.62 | 0.60-0.65 | 0.64 | 0.62-0.66 | 0.65 | 0.63-0.67 | 0.66 | 0.64-0.67 | 0.63 | 0.61-0.64 |
| Sleep Female | 0.63 | 0.60-0.65 | 0.63 | 0.31-0.66 | 0.66 | 0.64-0.68 | 0.65 | 0.63-0.67 | 0.63 | 0.61-0.64 |
| Physical Activity + Screentime Male | 0.14 | 0.13-0.16 | 0.13 | 0.11-0.14 | 0.11 | 0.10-0.12 | 0.13 | 0.12-0.14 | 0.12 | 0.11-0.13 |
| Physical Activity + Screentime Female | 0.12 | 0.11-0.14 | 0.12 | 0.10-0.13 | 0.09 | 0.08-0.10 | 0.10 | 0.09-0.10 | 0.09 | 0.08-0.09 |
| Physical Activity + Sleep Male | 0.16 | 0.14-0.17 | 0.14 | 0.13-0.16 | 0.15 | 0.14-0.17 | 0.16 | 0.15-0.18 | 0.14 | 0.13-0.15 |
| Physical Activity + Sleep Female | 0.12 | 0.10-0.13 | 0.11 | 0.10-0.13 | 0.11 | 0.10-0.12 | 0.11 | 0.10-0.12 | 0.09 | 0.08-0.10 |
| Screentime + Sleep Male | 0.33 | 0.31-0.35 | 0.34 | 0.32-0.36 | 0.26 | 0.25-0.28 | 0.29 | 0.27-0.30 | 0.32 | 0.30-0.33 |
| Screentime + Sleep Female | 0.37 | 0.35-0.39 | 0.37 | 0.35-0.39 | 0.30 | 0.28-0.32 | 0.32 | 0.30-0.34 | 0.33 | 0.31-0.34 |
| All Three Male | 0.10 | 0.09-0.12 | 0.09 | 0.08-0.10 | 0.08 | 0.07-0.10 | 0.09 | 0.08-0.10 | 0.09 | 0.08-0.10 |
| All Three Female | 0.09 | 0.08-0.10 | 0.09 | 0.07-0.10 | 0.07 | 0.06-0.07 | 0.07 | 0.06-0.08 | 0.06 | 0.05-0.07 |

**Table A2.** Marginal predicted probabilities of children and adolescents adhering to 24-hour movement behavior between 2018-2022 (N=135,309, Representative N=48,419,077).

| **24-hour guideline** | **Year** | | | | | | | | | |
| --- | --- | --- | --- | --- | --- | --- | --- | --- | --- | --- |
| **2018** | | **2019** | | **2020** | | **2021** | | **2022** | |
| **Margin** | **95% CI** | **Margin** | **95% CI** | **Margin** | **95% CI** | **Margin** | **95% CI** | **Margin** | **95% CI** |
| Physical Activity Children | 0.24 | 0.23-0.26 | 0.22 | 0.21-0.24 | 0.22 | 0.21-0.24 | 0.23 | 0.22-0.25 | 0.21 | 0.20-0.22 |
| Physical Activity Adolescents | 0.17 | 0.15-0.19 | 0.15 | 0.14-0.16 | 0.14 | 0.13-0.16 | 0.14 | 0.13-0.16 | 0.13 | 0.12-0.14 |
| Screentime Children | 0.64 | 0.61-0.66 | 0.63 | 0.60-0.65 | 0.50 | 0.48-0.52 | 0.55 | 0.54-0.57 | 0.59 | 0.57-0.60 |
| Screentime Adolescents | 0.40 | 0.38-0.43 | 0.40 | 0.38-0.43 | 0.61 | 0.29-0.32 | 0.32 | 0.30-0.34 | 0.35 | 0.34-0.37 |
| Sleep Children | 0.59 | 0.57-0.61 | 0.60 | 0.58-0.62 | 0.61 | 0.59-0.62 | 0.61 | 0.59-0.62 | 0.58 | 0.57-0.60 |
| Sleep Adolescents | 0.67 | 0.65-0.70 | 0.70 | 0.67-0.71 | 0.72 | 0.70-0.74 | 0.72 | 0.70-0.74 | 0.69 | 0.67-0.71 |
| Physical Activity + Screentime Children | 0.19 | 0.18-0.21 | 0.17 | 0.16-0.19 | 0.14 | 0.13-0.16 | 0.17 | 0.16-0.18 | 0.16 | 0.15-0.17 |
| Physical Activity + Screentime Adolescents | 0.08 | 0.07-0.10 | 0.08 | 0.07-0.09 | 0.06 | 0.05-0.07 | 0.06 | 0.05-0.07 | 0.06 | 0.05-0.06 |
| Physical Activity + Sleep Children | 0.15 | 0.13-0.16 | 0.14 | 0.13-0.16 | 0.14 | 0.13-0.16 | 0.15 | 0.14-0.16 | 0.13 | 0.12-0.14 |
| Physical Activity + Sleep Adolescents | 0.12 | 0.11-0.14 | 0.11 | 0.09-0.12 | 0.11 | 0.10-0.12 | 0.11 | 0.10-0.13 | 0.09 | 0.08-0.10 |
| Screentime + Sleep Children | 0.41 | 0.39-0.43 | 0.41 | 0.38-0.43 | 0.32 | 0.31-0.34 | 0.36 | 0.34-0.37 | 0.38 | 0.37-0.40 |
| Screentime + Sleep Adolescents | 0.28 | 0.26-0.30 | 0.30 | 0.27-0.32 | 0.23 | 0.21-0.25 | 0.24 | 0.22-0.26 | 0.26 | 0.24-0.27 |
| All Three Children | 0.13 | 0.12-0.14 | 0.12 | 0.11-0.14 | 0.10 | 0.09-0.11 | 0.12 | 0.11-0.13 | 0.11 | 0.10-0.12 |
| All Three Adolescents | 0.07 | 0.05-0.08 | 0.06 | 0.05-0.07 | 0.05 | 0.04-0.06 | 0.05 | 0.04-0.06 | 0.04 | 0.04-0.05 |

**Table A3.** Marginal predicted probabilities of normal and overweight children and adolescents adhering to 24-hour movement behavior between 2018-2022 (N=135,309, Representative N=48,419,077).

| **24-hour guideline** | **Year** | | | | | | | | | |
| --- | --- | --- | --- | --- | --- | --- | --- | --- | --- | --- |
| **2018** | | **2019** | | **2020** | | **2021** | | **2022** | |
| **Margin** | **95% CI** | **Margin** | **95% CI** | **Margin** | **95% CI** | **Margin** | **95% CI** | **Margin** | **95% CI** |
| Physical Activity Normal Weight | 0.23 | 0.21-0.24 | 0.20 | 0.19-0.22 | 0.20 | 0.19-0.22 | 0.21 | 0.19-0.22 | 0.18 | 0.17-0.19 |
| Physical Activity Overweight | 0.17 | 0.15-0.19 | 0.16 | 0.14-0.18 | 0.15 | 0.14-0.17 | 0.17 | 0.15-0.18 | 0.15 | 0.14-0.17 |
| Screentime Normal Weight | 0.54 | 0.52-0.56 | 0.53 | 0.51-0.55 | 0.42 | 0.41-0.44 | 0.45 | 0.43-0.46 | 0.49 | 0.47-0.50 |
| Screentime Overweight | 0.49 | 0.46-0.52 | 0.49 | 0.46-0.52 | 0.37 | 0.34-0.39 | 0.42 | 0.40-0.45 | 0.44 | 0.42-0.46 |
| Sleep Normal Weight | 0.65 | 0.63-0.67 | 0.66 | 0.64-0.68 | 0.68 | 0.66-0.69 | 0.67 | 0.65-0.68 | 0.65 | 0.63-0.66 |
| Sleep Overweight | 0.58 | 0.54-0.61 | 0.60 | 0.57-0.63 | 0.62 | 0.59-0.64 | 0.63 | 0.60-0.65 | 0.59 | 0.57-0.61 |
| Physical Activity + Screentime Normal Weight | 0.15 | 0.14-0.16 | 0.14 | 0.12-0.15 | 0.11 | 0.10-0.12 | 0.12 | 0.11-0.13 | 0.11 | 0.10-0.12 |
| Physical Activity + Screentime Overweight | 0.10 | 0.09-0.12 | 0.09 | 0.08-0.11 | 0.07 | 0.06-0.08 | 0.09 | 0.08-0.10 | 0.09 | 0.08-0.10 |
| Physical Activity + Sleep Normal Weight | 0.15 | 0.14-0.16 | 0.14 | 0.13-0.16 | 0.15 | 0.13-0.16 | 0.15 | 0.14-0.16 | 0.13 | 0.12-0.14 |
| Physical Activity + Sleep Overweight | 0.11 | 0.09-0.13 | 0.10 | 0.08-0.12 | 0.10 | 0.08-0.11 | 0.11 | 0.09-0.12 | 0.09 | 0.08-0.10 |
| Screentime + Sleep Normal Weight | 0.37 | 0.35-0.39 | 0.37 | 0.35-0.39 | 0.31 | 0.29-0.32 | 0.32 | 0.31-0.33 | 0.35 | 0.33-0.36 |
| Screentime + Sleep Overweight | 0.30 | 0.27-0.33 | 0.32 | 0.29-0.35 | 0.31 | 0.29-0.32 | 0.27 | 0.25-0.29 | 0.28 | 0.26-0.29 |
| All Three Normal Weight | 0.11 | 0.10-0.12 | 0.10 | 0.09-0.11 | 0.09 | 0.08-0.10 | 0.09 | 0.09-0.10 | 0.09 | 0.08-0.09 |
| All Three Overweight | 0.08 | 0.06-0.09 | 0.06 | 0.05-0.08 | 0.05 | 0.04-0.06 | 0.06 | 0.05-0.07 | 0.06 | 0.05-0.06 |

**Table A4**. Results from p-trend analysis showing trends in meeting 24-hour movement behavior guidelines among children and adolescents in the National Survey of Children’s Health between 2018-2022 (N=135,309, Representative N=48,419,077).

| **24-hour guideline** | **Year** | | | | | **Chi-square** | ***p*-value** |
| --- | --- | --- | --- | --- | --- | --- | --- |
| **2018** | **2019** | **2020** | **2021** | **2022** |
| **Met Guideline (Proportion)** | **Met Guideline (Proportion)** | **Met Guideline (Proportion)** | **Met Guideline (Proportion)** | **Met Guideline (Proportion)** |
| Physical Activity | 0.22 | 0.21 | 0.20 | 0.22 | 0.19 | 55.6 | <0.0001 |
| Screentime | 0.54 | 0.54 | 0.42 | 0.47 | 0.49 | 826.2 | <0.0001 |
| Sleep | 0.68 | 0.68 | 0.70 | 0.69 | 0.67 | 66.5 | 0.005 |
| Physical Activity + Screentime | 0.15 | 0.15 | 0.12 | 0.14 | 0.13 | 79.0 | <0.0001 |
| Physical Activity + Sleep | 0.15 | 0.15 | 0.15 | 0.16 | 0.14 | 52.8 | 0.0001 |
| Screentime + Sleep | 0.39 | 0.39 | 0.31 | 0.34 | 0.35 | 335.6 | <0.0001 |
| All Three | 0.11 | 0.11 | 0.09 | 0.10 | 0.09 | 50.0 | <0.0001 |

**APPENDIX B**

**STATA CODE**

/*

Project: Five-Year Trends in US Child and Adolescent 24hr Guideline Adherence, 2018-2022

Author: Christopher D. Pfledderer

Dataset: 2018-2022 National Survey of Children's Health

Data Access Date: 20 August 2024

Data Analysis Date: August 20, 2024 - March 5, 2025

Data Analysis Revision: June 19, 2025 - June 23, 2025

Data Availability: Data can be requested from the Data Resource Center for Child & Adolescent Health which can be accessed via this URL: https://www.childhealthdata.org/dataset

Codebook Availability: Codebooks for datatsets can be accessed from the Data Resource Center for Child & Adolescent Health which can be found via this URL: https://www.childhealthdata.org/learn-about-the-nsch/nsch-codebooks

Multi-Year Analysis Guides: Guides to multi-year analyses and appropriate weighting structure application using NSCH data can be found at the following URL:

https://www2.census.gov/programs-surveys/nsch/technical-documentation/methodology/NSCH-Guide-to-Multi-Year-Estimates.pdf

*/

**************************CALLING 2018 NSCH DATASET*****************************

*Insert the file path associated with the location in which you've saved the NSCH dataset to you computer in between the quotation marks in the line of code.

use " “ clear

************************APPENDING 2019-2022 DATASETS****************************

*Insert the file paths associated with the location in which you've saved the remaining NSCH datasets to your computer in between the quotation marks in the line of code.

append using “ “

************************APPLYING WEIGHTING STRUCTURE****************************

replace stratum="2" if stratum=="2A"

egen statacross=group(fipsst stratum)

gen fwc16_20=fwc/5

svyset hhid [pweight=fwc16_20], strata(statacross)

***********************DATA CLEANING AND VARIABLE CREATION**********************

drop if sc_age_years <6

gen bmi_bi = bmiclass

recode bmi_bi (1/2=0) (3/4=1)

gen pa_guide = physactiv

recode pa_guide (1/3=0) (4=1)

gen sleep_guide = hoursleep

recode sleep_guide (1 2 3 7 = 0) (4 5 6 = 1) if sc_age_years >=13

recode sleep_guide (1 2 3 4 = 0) (5 6 7 = 1) if sc_age_years <13

gen screen_guide = screentime

recode screen_guide (1/3=1) (4/5=0)

gen pasleep_guide = pa_guide + sleep_guide

gen pascreen_guide = pa_guide + screen_guide

gen sleepscreen_guide = sleep_guide + screen_guide

gen allthree_guide = pa_guide + sleep_guide + screen_guide

gen allthree_guide_bi = allthree_guide

recode allthree_guide_bi (0/2 = 0) (3=1)

gen pasleep_guide_bi = pasleep_guide

recode pasleep_guide_bi (0/1=0) (2=1)

gen pascreen_guide_bi = pascreen_guide

recode pascreen_guide_bi (0/1=0) (2=1)

gen sleepscreen_guide_bi = sleepscreen_guide

recode sleepscreen_guide_bi (0/1=0) (2=1)

gen age_bi = sc_age_years

recode age_bi (6/12 = 1) (13/17 = 2)

*Missing data for 24hr guideline adherence

count if missing(pa_guide)

count if missing(sleep_guide)

count if missing(screen_guide)

count if missing(allthree_guide_bi)

gen missing_guidelines = missing(pa_guide) + missing(sleep_guide) + missing(screen_guide)

tab missing_guidelines

drop if missing_guidelines ==1

drop if missing_guidelines ==2

drop if missing_guidelines ==3

********************DEMOGRAPHIC AND BEHAVIOR CHARACTERISTICS********************

************Calculating Age and Comparing Between Males and Females*************

summarize sc_age_years

svy: mean sc_age_years, over(sc_sex) coeflegend

lincom _b[c.sc_age_years@1bn.sc_sex] - _b[c.sc_age_years@2.sc_sex]

*********Calculating FPL Ratio and Comparing Between Males and Females**********

summarize fpl_i6

svy: mean fpl_i6, over(sc_sex) coeflegend

lincom _b[c.fpl_i6@1bn.sc_sex] - _b[c.fpl_i6@2.sc_sex]

*More information on the 'lincom' command can be found at: https://www.stata.com/manuals/rlincom.pdf

***Calculating Unweighted Counts for Demographic and Behavior Characteristics***

foreach var of varlist year age_bi sc_sex sc_race_r sc_hispanic_r bmi_bi metro_yn pa_guide sleep_guide screen_guide pascreen_guide_bi pasleep_guide_bi sleepscreen_guide_bi allthree_guide_bi {

tab `var'

}

*By Year*

foreach var of varlist age_bi sc_sex sc_race_r sc_hispanic_r bmi_bi metro_yn pa_guide sleep_guide screen_guide pascreen_guide_bi pasleep_guide_bi sleepscreen_guide_b allthree_guide_bi {

tab `var' year, chi

}

**Calculating Weighted Prevelance for Demographic and Behavior Characteristics**

foreach var of varlist year age_bi sc_sex sc_race_r sc_hispanic_r bmi_bi metro_yn pa_guide sleep_guide screen_guide pascreen_guide_bi pasleep_guide_bi sleepscreen_guide_b allthree_guide_bi {

svy: tab `var'

}

*By Year*

foreach var of varlist age_bi sc_sex sc_race_r sc_hispanic_r bmi_bi metro_yn pa_guide sleep_guide screen_guide pascreen_guide_bi pasleep_guide_bi sleepscreen_guide_b allthree_guide_bi {

svy: tab `var' year

}

************************POISSON REGRESSION MODELS******************************

**********************************and*******************************************

**********************MARGINAL PREDICTED PREVALENCES**************************

svy: poisson pa_guide i.screen_guide i.sleep_guide i.year i.sc_sex i.age_bi i.sc_race_r ib2.sc_hispanic_r i.bmi_bi i.metro_yn fpl_i6

margins year, atmeans

svy: poisson screen_guide i.pa_guide i.sleep_guide i.year i.sc_sex i.age_bi i.sc_race_r ib2.sc_hispanic_r i.bmi_bi i.metro_yn fpl_i6

margins year, atmeans

svy: poisson sleep_guide i.pa_guide i.screen_guide i.year i.sc_sex i.age_bi i.sc_race_r ib2.sc_hispanic_r i.bmi_bi i.metro_yn fpl_i6

margins year, atmeans

svy: poisson pascreen_guide_bi i.sleep_guide i.year i.sc_sex i.age_bi i.sc_race_r ib2.sc_hispanic_r i.bmi_bi i.metro_yn fpl_i6

margins year, atmeans

svy: poisson pasleep_guide_bi i.screen_guide i.year i.sc_sex i.age_bi i.sc_race_r ib2.sc_hispanic_r i.bmi_bi i.metro_yn fpl_i6

margins year, atmeans

svy: poisson sleepscreen_guide_bi i.pa_guide i.year i.sc_sex i.age_bi i.sc_race_r ib2.sc_hispanic_r i.bmi_bi i.metro_yn fpl_i6

margins year, atmeans

svy: poisson allthree_guide_bi i.year i.sc_sex i.age_bi i.sc_race_r ib2.sc_hispanic_r i.bmi_bi i.metro_yn fpl_i6

margins year, atmeans

*****************************INTERACTION MODELS*********************************

*BY SEX

*Physical Activity - Sex Interactions

svy: poisson pa_guide i.screen_guide i.sleep_guide i.year i.sc_sex i.year##i.sc_sex i.age_bi i.sc_race_r ib2.sc_hispanic_r i.bmi_bi i.metro_yn fpl_i6

margins i.year#i.sc_sex, atmeans

*Screentime - Sex Interactions

svy: poisson screen_guide i.pa_guide i.sleep_guide i.year i.sc_sex i.year##i.sc_sex i.age_bi i.sc_race_r ib2.sc_hispanic_r i.bmi_bi i.metro_yn fpl_i6

margins i.year#i.sc_sex, atmeans

*Sleep - Sex Interactions

svy: poisson sleep_guide i.pa_guide i.screen_guide i.year i.sc_sex i.year##i.sc_sex i.age_bi i.sc_race_r ib2.sc_hispanic_r i.bmi_bi i.metro_yn fpl_i6

margins i.year#i.sc_sex, atmeans

*Physical Activity + Screentime - Sex Interactions

svy: poisson pascreen_guide_bi i.sleep_guide i.year i.sc_sex i.year##i.sc_sex i.age_bi i.sc_race_r ib2.sc_hispanic_r i.bmi_bi i.metro_yn fpl_i6

margins year#i.sc_sex, atmeans

*Physical Activity + Sleep - Sex Interactions

svy: poisson pasleep_guide_bi i.screen_guide i.year i.sc_sex i.year##i.sc_sex i.age_bi i.sc_race_r ib2.sc_hispanic_r i.bmi_bi i.metro_yn fpl_i6

margins year#i.sc_sex, atmeans

*Screentime + Sleep - Sex Interactions

svy: poisson sleepscreen_guide_bi i.pa_guide i.year i.sc_sex i.year##i.sc_sex i.age_bi i.sc_race_r ib2.sc_hispanic_r i.bmi_bi i.metro_yn fpl_i6

margins year#i.sc_sex, atmeans

*All Three - Sex Interactions

svy: poisson allthree_guide_bi i.year i.sc_sex i.year##i.sc_sex i.age_bi i.sc_race_r ib2.sc_hispanic_r i.bmi_bi i.metro_yn fpl_i6

margins i.year#i.sc_sex, atmeans

*BY AGE

*Physical Activity - Age Interactions

svy: poisson pa_guide i.screen_guide i.sleep_guide i.year i.sc_sex i.age_bi i.year##i.age_bi i.sc_race_r ib2.sc_hispanic_r i.bmi_bi i.metro_yn fpl_i6

margins i.year#i.age_bi, atmeans

*Screentime - Age Interactions

svy: poisson screen_guide i.pa_guide i.sleep_guide i.year i.sc_sex i.age_bi i.year##i.age_bi i.sc_race_r ib2.sc_hispanic_r i.bmi_bi i.metro_yn fpl_i6

margins i.year#i.age_bi, atmeans

*Sleep - Age Interactions

svy: poisson sleep_guide i.pa_guide i.screen_guide i.year i.sc_sex i.age_bi i.year##i.age_bi i.sc_race_r ib2.sc_hispanic_r i.bmi_bi i.metro_yn fpl_i6

margins i.year#i.age_bi, atmeans

*Physical Activity + Screentime - Age Interactions

svy: poisson pascreen_guide_bi i.sleep_guide i.year i.sc_sex i.age_bi i.year##i.age_bi i.sc_race_r ib2.sc_hispanic_r i.bmi_bi i.metro_yn fpl_i6

margins i.year#i.age_bi, atmeans

*Physical Activity + Sleep - Age Interactions

svy: poisson pasleep_guide_bi i.screen_guide i.year i.sc_sex i.age_bi i.year##i.age_bi i.sc_race_r ib2.sc_hispanic_r i.bmi_bi i.metro_yn fpl_i6

margins i.year#i.age_bi, atmeans

*Screentime + Sleep - Age Interactions

svy: poisson sleepscreen_guide_bi i.pa_guide i.year i.sc_sex i.age_bi i.year##i.age_bi i.sc_race_r ib2.sc_hispanic_r i.bmi_bi i.metro_yn fpl_i6

margins i.year#i.age_bi, atmeans

*All Three - Age Interactions

svy: poisson allthree_guide_bi i.year i.sc_sex i.age_bi i.year##i.age_bi i.sc_race_r ib2.sc_hispanic_r i.bmi_bi i.metro_yn fpl_i6

margins i.year#i.age_bi, atmeans

*BY OBESITY STATUS

*Physical Activity - BMI Interactions

svy: poisson pa_guide i.screen_guide i.sleep_guide i.year i.sc_sex i.age_bi i.sc_race_r ib2.sc_hispanic_r i.bmi_bi i.year##i.bmi_bi i.metro_yn fpl_i6

margins i.year#i.bmi_bi, atmeans

*Screentime - BMI Interactions

svy: poisson screen_guide i.pa_guide i.sleep_guide i.year i.sc_sex i.age_bi i.sc_race_r ib2.sc_hispanic_r i.bmi_bi i.year##i.bmi_bi i.metro_yn fpl_i6

margins i.year#i.bmi_bi, atmeans

*Sleep - BMI Interactions

svy: poisson sleep_guide i.pa_guide i.screen_guide i.year i.sc_sex i.age_bi i.sc_race_r ib2.sc_hispanic_r i.bmi_bi i.year##i.bmi_bi i.metro_yn fpl_i6

margins i.year#i.bmi_bi, atmeans

*Physical Activity + Screentime - BMI Interactions

svy: poisson pascreen_guide_bi i.sleep_guide i.year i.sc_sex i.age_bi i.sc_race_r ib2.sc_hispanic_r i.bmi_bi i.year##i.bmi_bi i.metro_yn fpl_i6

margins i.year#i.bmi_bi, atmeans

*Physical Activity + Sleep - BMI Interactions

svy: poisson pasleep_guide_bi i.screen_guide i.year i.sc_sex i.age_bi i.sc_race_r ib2.sc_hispanic_r i.bmi_bi i.year##i.bmi_bi i.metro_yn fpl_i6

margins i.year#i.bmi_bi, atmeans

*Screentime + Sleep - BMI Interactions

svy: poisson sleepscreen_guide_bi i.pa_guide i.year i.sc_sex i.age_bi i.sc_race_r ib2.sc_hispanic_r i.bmi_bi i.year##i.bmi_bi i.metro_yn fpl_i6

margins i.year#i.bmi_bi, atmeans

*All Three - BMI Interactions

svy: poisson allthree_guide_bi i.year i.sc_sex i.age_bi i.sc_race_r ib2.sc_hispanic_r i.bmi_bi i.year##i.bmi_bi i.metro_yn fpl_i6

margins i.year#i.bmi_bi, atmeans

******************************P-TREND ANALYSIS**********************************

nptrend pa_guide, group(year) carmitage

nptrend screen_guide, group(year) carmitage

nptrend sleep_guide, group(year) carmitage

nptrend pascreen_guide_bi, group(year) carmitage

nptrend pasleep_guide_bi, group(year) carmitage

nptrend sleepscreen_guide_bi, group(year) carmitage

nptrend allthree_guide_bi, group(year) carmitage
